# Supplementary material for: Wunsch und Erleben von Partizipation für Kinder und Jugendliche in der stationären Psychiatrie
Source: Atypon-hosted journal article supplement (doi:10.1024/1422-4917/a000797), 2021-05-01

## Übersicht der Zusammenhänge zwischen Erleben von Partizipation und Gesamtzufriedenheit

|                                      | Präferenz → Zufriedenheit             | Erleben → Zufriedenheit                                                                                                       | Differenz → Zufriedenheit                                                                                              |
|--------------------------------------|---------------------------------------|-------------------------------------------------------------------------------------------------------------------------------|------------------------------------------------------------------------------------------------------------------------|
| Partizipation insgesamt              | Ø signifikant                         | $r = ,744^{**}$<br>$\beta_1 = 1,049$ ; $R^2 = ,651$ (Lin. Reg.)                                                               | $r = ,666^{**}$<br>$\beta_1 = ,873^{***}$ ; $R^2 = ,450$ (Lin. Reg.)                                                   |
| „Stufe 1“<br>(Information)           | Ø signifikant                         | $r = ,650^{**}$<br>$\beta_1 = ,709^{***}$ ; $R^2 = ,651$ (Lin. Reg.)<br>$\beta_1 = 0,555^{**}$ ; $R_K^2 = ,303$ (Multivariat) | $r = ,570^{**}$<br>$\beta_1 = ,649^{***}$ ; $R^2 = ,289$ (Lin. Reg.)                                                   |
| „Stufe 2“<br>(Deliberation)          | Ø signifikant                         | $r = ,663^{**}$<br>$\beta_1 = ,727^{***}$ ; $R^2 = ,673$ (Lin. Reg.)<br>$\beta_1 = ,677^{***}$ ; $R_K^2 = ,410$ (Multivariat) | $r = ,476^{**}$<br>$\beta_1 = ,584^{***}$ ; $R^2 = ,257$ (Lin. Reg.)                                                   |
| „Stufe 3“<br>(Entscheidung)          | leicht signifikant<br>( $r = -,320$ ) | $r = ,239^*$<br>$\beta_1 = ,263^*$ ; $R^2 = ,070$ (Lin. Reg.)<br>$\beta_1 = ,059$ ; $R_K^2 = ,063$ (Multivariat)              | $r = ,412^{**}$<br>$\beta_1 = ,348^{***}$ ; $R^2 = ,201$ (Lin. Reg.)<br><b><math>R^2 = ,243</math> (Quadrat. Reg.)</b> |
| Bereich 1<br>(Behandlung)            | Ø signifikant                         | $r = ,333^{**}$<br>$\beta_1 = ,305^{**}$ ; $R^2 = ,111$ (Lin. Reg.)<br>$\beta_1 = ,358$ ; $R_K^2 = ,106$ (Multivariat)        | $r = ,252^*$<br>$\beta_1 = ,211^*$ ; $R^2 = ,076$ (Lin. Reg.)<br><b><math>R^2 = ,084</math> (Quadrat. Reg.)</b>        |
| Bereich 3<br>(Alltag)                | Ø signifikant                         | $r = ,412^{**}$<br>$\beta_1 = ,460^{***}$ ; $R^2 = ,445$ (Lin. Reg.)<br>$\beta_1 = ,355^*$ ; $R_K^2 = ,204$                   | $r = ,384^{**}$<br>$\beta_1 = ,322^{***}$ ; $R^2 = ,158$ (Lin. Reg.)<br><b><math>R^2 = ,160</math> (Quadrat. Reg.)</b> |
| Bereich 2<br>(Interaktion mit Außen) | Ø signifikant                         | $r = ,457^{**}$<br>$\beta_1 = ,494^{***}$ ; $R^2 = ,490$ (Lin. Reg.)<br>$\beta_1 = ,437^{**}$ ; $R_K^2 = ,294$ (Multivariat)  | $r = ,511^{**}$<br>$\beta_1 = ,456^{***}$ ; $R^2 = ,284$ (Lin. Reg.)                                                   |
| „Respekt“                            | Ø signifikant                         | $r = ,701^{**}$<br>$\beta_1 = ,771^{***}$ ; $R^2 = ,508$ (Lin. Reg.)<br>$\beta_1 = ,608^{***}$ ; $R_K^2 = ,395$ (Multivariat) | $r = ,570^{**}$<br>$\beta_1 = ,599^{***}$ ; $R^2 = ,604$ (Lin. Reg.)                                                   |
| „Vertrauen“                          | leicht signifikant<br>( $r = -,261$ ) | $r = ,710^{**}$<br>$\beta_1 = ,718^{***}$ ; $R^2 = ,508$ (Lin. Reg.)<br>$\beta_1 = ,636^{***}$ ; $R_K^2 = ,476$ (Multivariat) | $r = ,567^{**}$<br>$\beta_1 = ,622^{***}$ ; $R^2 = ,315$ (Lin. Reg.)                                                   |

\*  $p < 0,05$  ; \*\*  $p < 0,01$  ; \*\*\*  $p < 0,001$

## Regression

### Aufgenommene/Entfernte Variablen<sup>a</sup>

| Modell | Aufgenommene Variablen                                                  | Entfernte Variablen | Methode   |
|--------|-------------------------------------------------------------------------|---------------------|-----------|
| 1      | Mittelwert (Erleben von Partizipation Insgesamt; 35 Items) <sup>b</sup> | .                   | Einschluß |

a. Abhängige Variable: Mittelwert(Zufriedenheit mit Behandlung, Alltag, Information, Entscheidungsfindung, Allgemein; 5 Items)

b. Alle gewünschten Variablen wurden eingegeben.

### Modellzusammenfassung

| Modell | R                 | R-Quadrat | Korrigiertes R-Quadrat | Standardfehler des Schätzers |
|--------|-------------------|-----------|------------------------|------------------------------|
| 1      | ,758 <sup>a</sup> | ,574      | ,568                   | ,67056                       |

a. Einflußvariablen : (Konstante), Mittelwert(Erleben von Partizipation Insgesamt; 35 Items)

### ANOVA<sup>a</sup>

| Modell |                                | Quadratsumme | df | Mittel der Quadrate | F      |
|--------|--------------------------------|--------------|----|---------------------|--------|
| 1      | Regression                     | 44,845       | 1  | 44,845              | 99,734 |
|        | Nicht standardisierte Residuen | 33,274       | 74 | ,450                |        |
|        | Gesamt                         | 78,119       | 75 |                     |        |

### ANOVA<sup>a</sup>

| Modell |                                | Sig.              |
|--------|--------------------------------|-------------------|
| 1      | Regression                     | ,000 <sup>b</sup> |
|        | Nicht standardisierte Residuen |                   |
|        | Gesamt                         |                   |

a. Abhängige Variable: Mittelwert(Zufriedenheit mit Behandlung, Alltag, Information, Entscheidungsfindung, Allgemein; 5 Items)

b. Einflußvariablen : (Konstante), Mittelwert(Erleben von Partizipation Insgesamt; 35 Items)

### Koeffizienten<sup>a</sup>

| Modell |                                                           | Nicht standardisierte Koeffizienten |             | Standardisierte Koeffizienten |       |
|--------|-----------------------------------------------------------|-------------------------------------|-------------|-------------------------------|-------|
|        |                                                           | Regressionskoeffizient B            | Std.-Fehler | Beta                          | T     |
| 1      | (Konstante)                                               | ,004                                | ,368        |                               | ,010  |
|        | Mittelwert(Erleben von Partizipation Insgesamt; 35 Items) | 1,049                               | ,105        | ,758                          | 9,987 |

### Koeffizienten<sup>a</sup>

| Modell |                                                           | Sig. |
|--------|-----------------------------------------------------------|------|
| 1      | (Konstante)                                               | ,992 |
|        | Mittelwert(Erleben von Partizipation Insgesamt; 35 Items) | ,000 |

a. Abhängige Variable: Mittelwert(Zufriedenheit mit Behandlung, Alltag, Information, Entscheidungsfindung, Allgemein; 5 Items)

```

REGRESSION
/MISSING LISTWISE
/STATISTICS COEFF OUTS R ANOVA
/CRITERIA=PIN(.05) POUT(.10)
/NOORIGIN
/DEPENDENT Scale_ZufriedenheitGesamt_EL
/METHOD=ENTER Scale_Phase1_EL.

```

## Regression

### Aufgenommene/Entfernte Variablen<sup>a</sup>

| Modell | Aufgenommene Variablen                                                                                  | Entfernte Variablen | Methode   |
|--------|---------------------------------------------------------------------------------------------------------|---------------------|-----------|
| 1      | Mittelwert (Erleben von Erklären, Offenheit, Beantwortung bei Behandlung& Alltag; 6 Items) <sup>b</sup> | .                   | Einschluß |

a. Abhängige Variable: Mittelwert(Zufriedenheit mit Behandlung, Alltag, Information, Entscheidungsfindung, Allgemein; 5 Items)

b. Alle gewünschten Variablen wurden eingegeben.

### Modellzusammenfassung

| Modell | R                 | R-Quadrat | Korrigiertes R-Quadrat | Standardfehler des Schätzers |
|--------|-------------------|-----------|------------------------|------------------------------|
| 1      | ,615 <sup>a</sup> | ,379      | ,370                   | ,80982                       |

a. Einflußvariablen : (Konstante), Mittelwert(Erleben von Erklären, Offenheit, Beantwortung bei Behandlung&Alltag; 6 Items)

### ANOVA<sup>a</sup>

| Modell |                                | Quadratsumme | df | Mittel der Quadrate | F      |
|--------|--------------------------------|--------------|----|---------------------|--------|
| 1      | Regression                     | 29,590       | 1  | 29,590              | 45,120 |
|        | Nicht standardisierte Residuen | 48,529       | 74 | ,656                |        |
|        | Gesamt                         | 78,119       | 75 |                     |        |

### ANOVA<sup>a</sup>

| Modell |                                | Sig.              |
|--------|--------------------------------|-------------------|
| 1      | Regression                     | ,000 <sup>b</sup> |
|        | Nicht standardisierte Residuen |                   |
|        | Gesamt                         |                   |

- a. Abhängige Variable: Mittelwert(Zufriedenheit mit Behandlung, Alltag, Information, Entscheidungsfindung, Allgemein; 5 Items)
- b. Einflußvariablen : (Konstante), Mittelwert(Erleben von Erklären, Offenheit, Beantwortung bei Behandlung&Alltag; 6 Items)

### Koeffizienten<sup>a</sup>

| Modell |                                                                                          | Nicht standardisierte Koeffizienten |             | Standardisierte Koeffizienten |       |
|--------|------------------------------------------------------------------------------------------|-------------------------------------|-------------|-------------------------------|-------|
|        |                                                                                          | Regressionskoeffizient B            | Std.-Fehler | Beta                          | T     |
| 1      | (Konstante)                                                                              | ,888                                | ,415        |                               | 2,143 |
|        | Mittelwert(Erleben von Erklären, Offenheit, Beantwortung bei Behandlung&Alltag; 6 Items) | ,709                                | ,106        | ,615                          | 6,717 |

### Koeffizienten<sup>a</sup>

| Modell |                                                                                          | Sig. |
|--------|------------------------------------------------------------------------------------------|------|
| 1      | (Konstante)                                                                              | ,035 |
|        | Mittelwert(Erleben von Erklären, Offenheit, Beantwortung bei Behandlung&Alltag; 6 Items) | ,000 |

- a. Abhängige Variable: Mittelwert(Zufriedenheit mit Behandlung, Alltag, Information, Entscheidungsfindung, Allgemein; 5 Items)

```

REGRESSION
/MISSING LISTWISE
/STATISTICS COEFF OUTS R ANOVA
/CRITERIA=PIN(.05) POUT(.10)
/NOORIGIN
/DEPENDENT Scale_ZufriedenheitGesamt_EL
/METHOD=ENTER Scale_Phase2_EL.

```

## Regression

### Aufgenommene/Entfernte Variablen<sup>a</sup>

| Modell | Aufgenommene Variablen                                                                                     | Entfernte Variablen | Methode   |
|--------|------------------------------------------------------------------------------------------------------------|---------------------|-----------|
| 1      | Mittelwert (Erleben von Bescheid Wissen, Gemeinsam Überlegen bei Behandlung& Alltag; 4 Items) <sup>b</sup> | .                   | Einschluß |

a. Abhängige Variable: Mittelwert(Zufriedenheit mit Behandlung, Alltag, Information, Entscheidungsfindung, Allgemein; 5 Items)

b. Alle gewünschten Variablen wurden eingegeben.

### Modellzusammenfassung

| Modell | R                 | R-Quadrat | Korrigiertes R-Quadrat | Standardfehler des Schätzers |
|--------|-------------------|-----------|------------------------|------------------------------|
| 1      | ,673 <sup>a</sup> | ,453      | ,446                   | ,75976                       |

a. Einflußvariablen : (Konstante), Mittelwert(Erleben von Bescheid Wissen,Gemeinsam Überlegen bei Behandlung&Alltag; 4 Items)

### ANOVA<sup>a</sup>

| Modell |                                | Quadratsumme | df | Mittel der Quadrate | F      |
|--------|--------------------------------|--------------|----|---------------------|--------|
| 1      | Regression                     | 35,404       | 1  | 35,404              | 61,335 |
|        | Nicht standardisierte Residuen | 42,715       | 74 | ,577                |        |
|        | Gesamt                         | 78,119       | 75 |                     |        |

### ANOVA<sup>a</sup>

| Modell |                                | Sig.              |
|--------|--------------------------------|-------------------|
| 1      | Regression                     | ,000 <sup>b</sup> |
|        | Nicht standardisierte Residuen |                   |
|        | Gesamt                         |                   |

- a. Abhängige Variable: Mittelwert(Zufriedenheit mit Behandlung, Alltag, Information, Entscheidungsfindung, Allgemein; 5 Items)
- b. Einflußvariablen : (Konstante), Mittelwert(Erleben von Bescheid Wissen, Gemeinsam Überlegen bei Behandlung&Alltag; 4 Items)

### Koeffizienten<sup>a</sup>

| Modell |                                                                                             | Nicht standardisierte Koeffizienten |             | Standardisierte Koeffizienten |       |
|--------|---------------------------------------------------------------------------------------------|-------------------------------------|-------------|-------------------------------|-------|
|        |                                                                                             | Regressionskoeffizient B            | Std.-Fehler | Beta                          | T     |
| 1      | (Konstante)                                                                                 | 1,023                               | ,341        |                               | 3,001 |
|        | Mittelwert(Erleben von Bescheid Wissen, Gemeinsam Überlegen bei Behandlung&Alltag; 4 Items) | ,727                                | ,093        | ,673                          | 7,832 |

### Koeffizienten<sup>a</sup>

| Modell |                                                                                             | Sig. |
|--------|---------------------------------------------------------------------------------------------|------|
| 1      | (Konstante)                                                                                 | ,004 |
|        | Mittelwert(Erleben von Bescheid Wissen, Gemeinsam Überlegen bei Behandlung&Alltag; 4 Items) | ,000 |

- a. Abhängige Variable: Mittelwert(Zufriedenheit mit Behandlung, Alltag, Information, Entscheidungsfindung, Allgemein; 5 Items)

```

REGRESSION
/MISSING LISTWISE
/STATISTICS COEFF OUTS R ANOVA
/CRITERIA=PIN(.05) POUT(.10)
/NOORIGIN
/DEPENDENT Scale_ZufriedenheitGesamt_EL
/METHOD=ENTER Scale_Phase3_EL.

```

## Regression

### Aufgenommene/Entfernte Variablen<sup>a</sup>

| Modell | Aufgenommene Variablen                                                              | Entfernte Variablen | Methode   |
|--------|-------------------------------------------------------------------------------------|---------------------|-----------|
| 1      | Mittelwert (Erleben von Rolle bei Behandlungs-Entscheidungen; 2 Items) <sup>b</sup> | .                   | Einschluß |

a. Abhängige Variable: Mittelwert(Zufriedenheit mit Behandlung, Alltag, Information, Entscheidungsfindung, Allgemein; 5 Items)

b. Alle gewünschten Variablen wurden eingegeben.

### Modellzusammenfassung

| Modell | R                 | R-Quadrat | Korrigiertes R-Quadrat | Standardfehler des Schätzers |
|--------|-------------------|-----------|------------------------|------------------------------|
| 1      | ,265 <sup>a</sup> | ,070      | ,057                   | ,98820                       |

a. Einflußvariablen : (Konstante), Mittelwert(Erleben von Rolle bei Behandlungs-Entscheidungen; 2 Items)

### ANOVA<sup>a</sup>

| Modell |                                | Quadratsumme | df | Mittel der Quadrate | F     |
|--------|--------------------------------|--------------|----|---------------------|-------|
| 1      | Regression                     | 5,379        | 1  | 5,379               | 5,508 |
|        | Nicht standardisierte Residuen | 71,288       | 73 | ,977                |       |
|        | Gesamt                         | 76,667       | 74 |                     |       |

### ANOVA<sup>a</sup>

| Modell |                                | Sig.              |
|--------|--------------------------------|-------------------|
| 1      | Regression                     | ,022 <sup>b</sup> |
|        | Nicht standardisierte Residuen |                   |
|        | Gesamt                         |                   |

a. Abhängige Variable: Mittelwert(Zufriedenheit mit Behandlung, Alltag, Information, Entscheidungsfindung, Allgemein; 5 Items)

b. Einflußvariablen : (Konstante), Mittelwert(Erleben von Rolle bei Behandlungs-Entscheidungen; 2 Items)



### Koeffizienten<sup>a</sup>

| Modell |                                                                       | Nicht standardisierte Koeffizienten |             | Standardisierte Koeffizienten | T      |
|--------|-----------------------------------------------------------------------|-------------------------------------|-------------|-------------------------------|--------|
|        |                                                                       | Regressionskoeffizient B            | Std.-Fehler | Beta                          |        |
| 1      | (Konstante)                                                           | 2,949                               | ,295        |                               | 10,010 |
|        | Mittelwert(Erleben von Rolle bei Behandlungs-Entscheidungen; 2 Items) | ,263                                | ,112        | ,265                          | 2,347  |

### Koeffizienten<sup>a</sup>

| Modell |                                                                       | Sig. |
|--------|-----------------------------------------------------------------------|------|
| 1      | (Konstante)                                                           | ,000 |
|        | Mittelwert(Erleben von Rolle bei Behandlungs-Entscheidungen; 2 Items) | ,022 |

a. Abhängige Variable: Mittelwert(Zufriedenheit mit Behandlung, Alltag, Information, Entscheidungsfindung, Allgemein; 5 Items)

REGRESSION

/MISSING LISTWISE

/STATISTICS COEFF OUTS R ANOVA

/CRITERIA=PIN(.05) POUT(.10)

/NOORIGIN

/DEPENDENT Scale\_ZufriedenheitGesamt\_EL

/METHOD=ENTER Scale\_BereichBehandlung\_EL

## Regression

### Aufgenommene/Entfernte Variablen<sup>a</sup>

| Modell | Aufgenommene Variablen                                                                  | Entfernte Variablen | Methode   |
|--------|-----------------------------------------------------------------------------------------|---------------------|-----------|
| 1      | Mittelwert (Erleben von Beteiligung an Behandlungsentscheidungen; 4 Items) <sup>b</sup> | .                   | Einschluß |

a. Abhängige Variable: Mittelwert(Zufriedenheit mit Behandlung, Alltag, Information, Entscheidungsfindung, Allgemein; 5 Items)

b. Alle gewünschten Variablen wurden eingegeben.

### Modellzusammenfassung

| Modell | R                 | R-Quadrat | Korrigiertes R-Quadrat | Standardfehler des Schätzers |
|--------|-------------------|-----------|------------------------|------------------------------|
| 1      | ,332 <sup>a</sup> | ,111      | ,098                   | ,96902                       |

a. Einflußvariablen : (Konstante), Mittelwert(Erleben von Beteiligungsentscheidungen; 4 Items)

### ANOVA<sup>a</sup>

| Modell |                                | Quadratsumme | df | Mittel der Quadrate | F     |
|--------|--------------------------------|--------------|----|---------------------|-------|
| 1      | Regression                     | 8,633        | 1  | 8,633               | 9,194 |
|        | Nicht standardisierte Residuen | 69,487       | 74 | ,939                |       |
|        | Gesamt                         | 78,119       | 75 |                     |       |

### ANOVA<sup>a</sup>

| Modell |                                | Sig.              |
|--------|--------------------------------|-------------------|
| 1      | Regression                     | ,003 <sup>b</sup> |
|        | Nicht standardisierte Residuen |                   |
|        | Gesamt                         |                   |

a. Abhängige Variable: Mittelwert(Zufriedenheit mit Behandlung, Alltag, Information, Entscheidungsfindung, Allgemein; 5 Items)

b. Einflußvariablen : (Konstante), Mittelwert(Erleben von Beteiligung an Behandlungsentscheidungen; 4 Items)

### Koeffizienten<sup>a</sup>

| Modell |                                                                           | Nicht standardisierte Koeffizienten |             | Standardisierte Koeffizienten |       |
|--------|---------------------------------------------------------------------------|-------------------------------------|-------------|-------------------------------|-------|
|        |                                                                           | Regressionskoeffizient B            | Std.-Fehler | Beta                          | T     |
| 1      | (Konstante)                                                               | 2,563                               | ,360        |                               | 7,114 |
|        | Mittelwert(Erleben von Beteiligung an Behandlungsentscheidungen; 4 Items) | ,305                                | ,101        | ,332                          | 3,032 |

### Koeffizienten<sup>a</sup>

| Modell |                                                                           | Sig. |
|--------|---------------------------------------------------------------------------|------|
| 1      | (Konstante)                                                               | ,000 |
|        | Mittelwert(Erleben von Beteiligung an Behandlungsentscheidungen; 4 Items) | ,003 |

a. Abhängige Variable: Mittelwert(Zufriedenheit mit Behandlung, Alltag, Information, Entscheidungsfindung, Allgemein; 5 Items)

REGRESSION

/MISSING LISTWISE

/STATISTICS COEFF OUTS R ANOVA

/CRITERIA=PIN(.05) POUT(.10)

/NOORIGIN

/DEPENDENT Scale\_ZufriedenheitGesamt\_EL

/METHOD=ENTER Scale\_BereichInteraktDraußen\_EL

## Regression

### Aufgenommene/Entfernte Variablen<sup>a</sup>

| Modell | Aufgenommene Variablen                                                                                    | Entfernte Variablen | Methode   |
|--------|-----------------------------------------------------------------------------------------------------------|---------------------|-----------|
| 1      | Mittelwert (Erleben von Beteiligung in Bezug auf die Interaktion mit der Außenwelt; 6 Items) <sup>b</sup> | .                   | Einschluß |

a. Abhängige Variable: Mittelwert(Zufriedenheit mit Behandlung, Alltag, Information, Entscheidungsfindung, Allgemein; 5 Items)

b. Alle gewünschten Variablen wurden eingegeben.

### Modellzusammenfassung

| Modell | R                 | R-Quadrat | Korrigiertes R-Quadrat | Standardfehler des Schätzers |
|--------|-------------------|-----------|------------------------|------------------------------|
| 1      | ,490 <sup>a</sup> | ,240      | ,230                   | ,90147                       |

a. Einflußvariablen : (Konstante), Mittelwert(Erleben von Beteiligung in Bezug auf die Interaktion mit der Außenwelt; 6 Items)

### ANOVA<sup>a</sup>

| Modell |                                | Quadratsumme | df | Mittel der Quadrate | F      |
|--------|--------------------------------|--------------|----|---------------------|--------|
| 1      | Regression                     | 18,754       | 1  | 18,754              | 23,078 |
|        | Nicht standardisierte Residuen | 59,324       | 73 | ,813                |        |
|        | Gesamt                         | 78,078       | 74 |                     |        |

### ANOVA<sup>a</sup>

| Modell |                                | Sig.              |
|--------|--------------------------------|-------------------|
| 1      | Regression                     | ,000 <sup>b</sup> |
|        | Nicht standardisierte Residuen |                   |
|        | Gesamt                         |                   |

a. Abhängige Variable: Mittelwert(Zufriedenheit mit Behandlung, Alltag, Information, Entscheidungsfindung, Allgemein; 5 Items)

b. Einflußvariablen : (Konstante), Mittelwert(Erleben von Beteiligung in Bezug auf die Interaktion mit der Außenwelt; 6 Items)

### Koeffizienten<sup>a</sup>

| Modell |                                                                                             | Nicht standardisierte Koeffizienten |             | Standardisierte Koeffizienten | T     |
|--------|---------------------------------------------------------------------------------------------|-------------------------------------|-------------|-------------------------------|-------|
|        |                                                                                             | Regressionskoeffizient B            | Std.-Fehler | Beta                          |       |
| 1      | (Konstante)                                                                                 | 2,120                               | ,326        |                               | 6,497 |
|        | Mittelwert(Erleben von Beteiligung in Bezug auf die Interaktion mit der Außenwelt; 6 Items) | ,494                                | ,103        | ,490                          | 4,804 |

### Koeffizienten<sup>a</sup>

| Modell |                                                                                             | Sig. |
|--------|---------------------------------------------------------------------------------------------|------|
| 1      | (Konstante)                                                                                 | ,000 |
|        | Mittelwert(Erleben von Beteiligung in Bezug auf die Interaktion mit der Außenwelt; 6 Items) | ,000 |

a. Abhängige Variable: Mittelwert(Zufriedenheit mit Behandlung, Alltag, Information, Entscheidungsfindung, Allgemein; 5 Items)

REGRESSION

/MISSING LISTWISE

/STATISTICS COEFF OUTS R ANOVA

/CRITERIA=PIN(.05) POUT(.10)

/NOORIGIN

/DEPENDENT Scale\_ZufriedenheitGesamt\_EL

/METHOD=ENTER Scale\_BereichAlltagStation\_EL

## Regression

### Aufgenommene/Entfernte Variablen<sup>a</sup>

| Modell | Aufgenommene Variablen                                                                            | Entfernte Variablen | Methode   |
|--------|---------------------------------------------------------------------------------------------------|---------------------|-----------|
| 1      | Mittelwert (Erleben von Beteiligung in Bezug auf den Alltag in der Station; 7 Items) <sup>b</sup> | .                   | Einschluß |

a. Abhängige Variable: Mittelwert(Zufriedenheit mit Behandlung, Alltag, Information, Entscheidungsfindung, Allgemein; 5 Items)

b. Alle gewünschten Variablen wurden eingegeben.

### Modellzusammenfassung

| Modell | R                 | R-Quadrat | Korrigiertes R-Quadrat | Standardfehler des Schätzers |
|--------|-------------------|-----------|------------------------|------------------------------|
| 1      | ,445 <sup>a</sup> | ,198      | ,187                   | ,92016                       |

a. Einflußvariablen : (Konstante), Mittelwert(Erleben von Beteiligung in Bezug auf den Alltag in der Station; 7 Items)

### ANOVA<sup>a</sup>

| Modell |                                | Quadratsumme | df | Mittel der Quadrate | F      |
|--------|--------------------------------|--------------|----|---------------------|--------|
| 1      | Regression                     | 15,464       | 1  | 15,464              | 18,264 |
|        | Nicht standardisierte Residuen | 62,656       | 74 | ,847                |        |
|        | Gesamt                         | 78,119       | 75 |                     |        |

### ANOVA<sup>a</sup>

| Modell |                                | Sig.              |
|--------|--------------------------------|-------------------|
| 1      | Regression                     | ,000 <sup>b</sup> |
|        | Nicht standardisierte Residuen |                   |
|        | Gesamt                         |                   |

a. Abhängige Variable: Mittelwert(Zufriedenheit mit Behandlung, Alltag, Information, Entscheidungsfindung, Allgemein; 5 Items)

b. Einflußvariablen : (Konstante), Mittelwert(Erleben von Beteiligung in Bezug auf den Alltag in der Station; 7 Items)

### Koeffizienten<sup>a</sup>

| Modell |                                                                                     | Nicht standardisierte Koeffizienten |             | Standardisierte Koeffizienten | T     |
|--------|-------------------------------------------------------------------------------------|-------------------------------------|-------------|-------------------------------|-------|
|        |                                                                                     | Regressionskoeffizient B            | Std.-Fehler | Beta                          |       |
| 1      | (Konstante)                                                                         | 2,248                               | ,334        |                               | 6,731 |
|        | Mittelwert(Erleben von Beteiligung in Bezug auf den Alltag in der Station; 7 Items) | ,460                                | ,108        | ,445                          | 4,274 |

### Koeffizienten<sup>a</sup>

| Modell |                                                                                     | Sig. |
|--------|-------------------------------------------------------------------------------------|------|
| 1      | (Konstante)                                                                         | ,000 |
|        | Mittelwert(Erleben von Beteiligung in Bezug auf den Alltag in der Station; 7 Items) | ,000 |

a. Abhängige Variable: Mittelwert(Zufriedenheit mit Behandlung, Alltag, Information, Entscheidungsfindung, Allgemein; 5 Items)

REGRESSION

/MISSING LISTWISE

/STATISTICS COEFF OUTS R ANOVA

/CRITERIA=PIN(.05) POUT(.10)

/NOORIGIN

/DEPENDENT Scale\_ZufriedenheitGesamt\_EL

/METHOD=ENTER Scale\_Respekt\_EL

## Regression

### Aufgenommene/Entfernte Variablen<sup>a</sup>

| Modell | Aufgenommene Variablen                                 | Entfernte Variablen | Methode   |
|--------|--------------------------------------------------------|---------------------|-----------|
| 1      | Mittelwert (Erleben von Respekt; 4 Items) <sup>b</sup> | .                   | Einschluß |

a. Abhängige Variable: Mittelwert(Zufriedenheit mit Behandlung, Alltag, Information, Entscheidungsfindung, Allgemein; 5 Items)

b. Alle gewünschten Variablen wurden eingegeben.

### Modellzusammenfassung

| Modell | R                 | R-Quadrat | Korrigiertes R-Quadrat | Standardfehler des Schätzers |
|--------|-------------------|-----------|------------------------|------------------------------|
| 1      | ,713 <sup>a</sup> | ,508      | ,502                   | ,72058                       |

a. Einflußvariablen : (Konstante), Mittelwert(Erleben von Respekt; 4 Items)

### ANOVA<sup>a</sup>

| Modell |                                | Quadratsumme | df | Mittel der Quadrate | F      |
|--------|--------------------------------|--------------|----|---------------------|--------|
| 1      | Regression                     | 39,696       | 1  | 39,696              | 76,452 |
|        | Nicht standardisierte Residuen | 38,423       | 74 | ,519                |        |
|        | Gesamt                         | 78,119       | 75 |                     |        |

### ANOVA<sup>a</sup>

| Modell |                                | Sig.              |
|--------|--------------------------------|-------------------|
| 1      | Regression                     | ,000 <sup>b</sup> |
|        | Nicht standardisierte Residuen |                   |
|        | Gesamt                         |                   |

a. Abhängige Variable: Mittelwert(Zufriedenheit mit Behandlung, Alltag, Information, Entscheidungsfindung, Allgemein; 5 Items)

b. Einflußvariablen : (Konstante), Mittelwert(Erleben von Respekt; 4 Items)



### Koeffizienten<sup>a</sup>

| Modell |                                          | Nicht standardisierte Koeffizienten |             | Standardisierte Koeffizienten | T     |
|--------|------------------------------------------|-------------------------------------|-------------|-------------------------------|-------|
|        |                                          | Regressionskoeffizient B            | Std.-Fehler | Beta                          |       |
| 1      | (Konstante)                              | ,710                                | ,341        |                               | 2,081 |
|        | Mittelwert(Erleben von Respekt; 4 Items) | ,771                                | ,088        | ,713                          | 8,744 |

### Koeffizienten<sup>a</sup>

| Modell |                                          | Sig. |
|--------|------------------------------------------|------|
| 1      | (Konstante)                              | ,041 |
|        | Mittelwert(Erleben von Respekt; 4 Items) | ,000 |

a. Abhängige Variable: Mittelwert(Zufriedenheit mit Behandlung, Alltag, Information, Entscheidungsfindung, Allgemein; 5 Items)

#### REGRESSION

```

/MISSING LISTWISE
/STATISTICS COEFF OUTS R ANOVA
/CRITERIA=PIN(.05) POUT(.10)
/NOORIGIN
/DEPENDENT Scale_ZufriedenheitGesamt_EL
/METHOD=ENTER Scale_Vertrauen_EL

```

## Regression

### Aufgenommene/Entfernte Variablen<sup>a</sup>

| Modell | Aufgenommene Variablen                                   | Entfernte Variablen | Methode   |
|--------|----------------------------------------------------------|---------------------|-----------|
| 1      | Mittelwert (Erleben von Vertrauen; 4 Items) <sup>b</sup> | .                   | Einschluß |

a. Abhängige Variable: Mittelwert(Zufriedenheit mit Behandlung, Alltag, Information, Entscheidungsfindung, Allgemein; 5 Items)

b. Alle gewünschten Variablen wurden eingegeben.

### Modellzusammenfassung

| Modell | R                 | R-Quadrat | Korrigiertes R-Quadrat | Standardfehler des Schätzers |
|--------|-------------------|-----------|------------------------|------------------------------|
| 1      | ,713 <sup>a</sup> | ,508      | ,501                   | ,72071                       |

a. Einflußvariablen : (Konstante), Mittelwert(Erleben von Vertrauen; 4 Items)

### ANOVA<sup>a</sup>

| Modell |                                | Quadratsumme | df | Mittel der Quadrate | F      |
|--------|--------------------------------|--------------|----|---------------------|--------|
| 1      | Regression                     | 39,682       | 1  | 39,682              | 76,396 |
|        | Nicht standardisierte Residuen | 38,437       | 74 | ,519                |        |
|        | Gesamt                         | 78,119       | 75 |                     |        |

### ANOVA<sup>a</sup>

| Modell |                                | Sig.              |
|--------|--------------------------------|-------------------|
| 1      | Regression                     | ,000 <sup>b</sup> |
|        | Nicht standardisierte Residuen |                   |
|        | Gesamt                         |                   |

a. Abhängige Variable: Mittelwert(Zufriedenheit mit Behandlung, Alltag, Information, Entscheidungsfindung, Allgemein; 5 Items)

b. Einflußvariablen : (Konstante), Mittelwert(Erleben von Vertrauen; 4 Items)

### Koeffizienten<sup>a</sup>

| Modell |                                            | Nicht standardisierte Koeffizienten |             | Standardisierte Koeffizienten | T     |
|--------|--------------------------------------------|-------------------------------------|-------------|-------------------------------|-------|
|        |                                            | Regressionskoeffizient B            | Std.-Fehler | Beta                          |       |
| 1      | (Konstante)                                | 1,019                               | ,307        |                               | 3,322 |
|        | Mittelwert(Erleben von Vertrauen; 4 Items) | ,718                                | ,082        | ,713                          | 8,740 |

## Koeffizienten<sup>a</sup>

| Modell |                                            | Sig. |
|--------|--------------------------------------------|------|
| 1      | (Konstante)                                | ,001 |
|        | Mittelwert(Erleben von Vertrauen; 4 Items) | ,000 |

a. Abhängige Variable: Mittelwert(Zufriedenheit mit Behandlung, Alltag, Information, Entscheidungsfindung, Allgemein; 5 Items)

# Kurvenanpassung

## Modell-Beschreibung

|                                                              |   |                                                                                                                            |
|--------------------------------------------------------------|---|----------------------------------------------------------------------------------------------------------------------------|
| Modell                                                       |   | MOD_4                                                                                                                      |
| Abhängige Variable                                           | 1 | Mittelwert<br>(Zufriedenheit mit<br>Behandlung, Alltag,<br>Information,<br>Entscheidungsfindung,<br>Allgemein; 5<br>Items) |
| Gleichung                                                    | 1 | Linear                                                                                                                     |
|                                                              | 2 | Quadratisch                                                                                                                |
| Unabhängige Variable                                         |   | Differenz der Skalen<br>zu Phase 3                                                                                         |
| Konstante                                                    |   | Eingeschlossen                                                                                                             |
| Variable zur Beschriftung der Beobachtungen in<br>Diagrammen |   | Unspezifiziert                                                                                                             |
| Toleranz für die Aufnahme von Termen in Gleichungen          |   | ,0001                                                                                                                      |

## Zusammenfassung der Fallverarbeitung

|                                    | N  |
|------------------------------------|----|
| Gesamtzahl der Fälle               | 81 |
| Ausgeschlossene Fälle <sup>a</sup> | 7  |
| Prognostizierte Fälle              | 0  |
| Neu erstellte Fälle                | 0  |

a. Fälle mit einem fehlenden Wert in einer Variablen werden aus der Analyse ausgeschlossen.

## Zusammenfassung der Variablenverarbeitung

|                            |                           | Variablen                                                                                                                            |                                                         |
|----------------------------|---------------------------|--------------------------------------------------------------------------------------------------------------------------------------|---------------------------------------------------------|
|                            |                           | Abhängig<br>Mittelwert<br>(Zufriedenheit mit<br>Behandlung, Alltag,<br>Information, Entscheidungsfi<br>ndung, Allgemein; 5<br>Items) | Unabhängig<br><br>Differenz der<br>Skalen zu<br>Phase 3 |
| Anzahl der positiven Werte |                           | 76                                                                                                                                   | 12                                                      |
| Anzahl der Nullen          |                           | 0                                                                                                                                    | 21                                                      |
| Anzahl der negativen Werte |                           | 0                                                                                                                                    | 43                                                      |
| Anzahl der fehlenden Werte | Benutzerdefiniert fehlend | 0                                                                                                                                    | 0                                                       |
|                            | Systemdefiniert fehlend   | 5                                                                                                                                    | 5                                                       |

## Modellzusammenfassung und Parameterschätzer

Abhängige Variable: Mittelwert(Zufriedenheit mit Behandlung, Alltag, Information, Entscheidungsfindung, Allgemein; 5 Items)

| Modellzusammenfassung |           |        |                     |                     |      | Parameters.. |
|-----------------------|-----------|--------|---------------------|---------------------|------|--------------|
| Gleichung             | R-Quadrat | F      | Freiheitsgrade<br>1 | Freiheitsgrade<br>2 | Sig. | Konstante    |
| Linear                | ,201      | 18,079 | 1                   | 72                  | ,000 | 3,938        |
| Quadratisch           | ,243      | 11,418 | 2                   | 71                  | ,000 | 3,978        |

## Modellzusammenfassung und Parameterschätzer

Abhängige Variable: Mittelwert(Zufriedenheit mit Behandlung, Alltag, Information, Entscheidungsfindung, Allgemein; 5 Items)

| Parameterschätzer |      |       |
|-------------------|------|-------|
| Gleichung         | b1   | b2    |
| Linear            | ,384 |       |
| Quadratisch       | ,104 | -,134 |

Die unabhängige Variable ist Differenz der Skalen zu Phase 3.

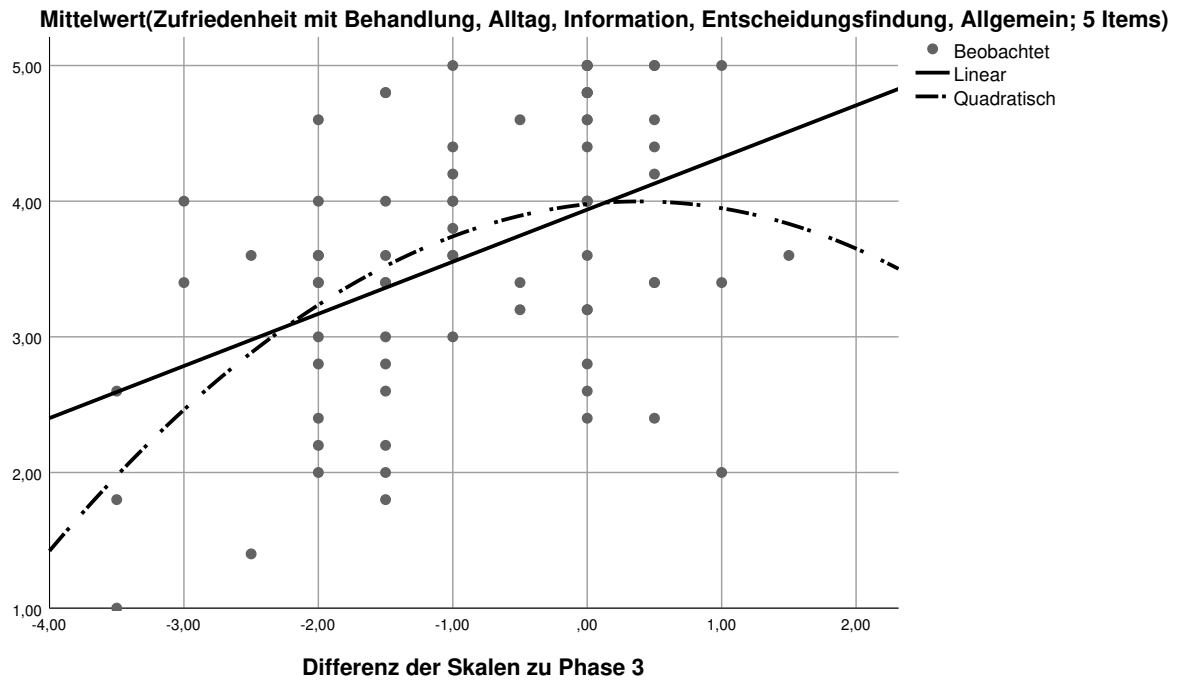

Supplement: 1422-4917_a000797_esm3.pdf [file 1422-4917_a000797_esm3.pdf]
