# Supplementary material for: Wunsch und Erleben von Partizipation für Kinder und Jugendliche in der stationären Psychiatrie
Source: Atypon-hosted journal article supplement (doi:10.1024/1422-4917/a000797), 2021-05-01
Supplement: 1422-4917_a000797_esm1.pdf [file 1422-4917_a000797_esm1.pdf]

## FAKTORENSTRUKTUR

Die Wunsch-Items zu Phasen der Beteiligung, Bereichen der Beteiligung und zu Beteiligung „im weiteren Sinne“ wurden jeweils einer eigenen Faktorenanalyse unterzogen. Ziel hierbei war zu eruieren, anhand welcher Dimensionen die Patienten ihre Beteiligung während des Klinikaufenthalts repräsentieren. Außerdem wurde dadurch die Frage überprüft, ob die a priori gebildeten Skalen empirisch gültig sind. Als Methode der Faktorenextraktion wurde die Hauptkomponentenanalyse gewählt, als Rotationsmethode die Varimax-Rotation. Das Kaiser-Meyer-Olkin-Kriterium zeigte bei allen betrachteten Itemgruppen einen für die Faktorenanalyse geeigneten Datensatz (KMO: 0,75 – 0,80).

Für die 14 Items zu Phasen der Beteiligung ergab sich zuerst eine inhaltlich unklare Faktorenstruktur. Die Items zur dritten Phase (Entscheidung treffen), die bereits in der Reliabilitätsanalyse nur eine geringe interne Konsistenz aufwiesen, wurden daher für die weitere Detailanalyse ausgeschlossen. Bei Untersuchung der 10 Items zu den ersten beiden Phasen der Beteiligung (Informationsaustausch, Deliberation) wurden nach dem Eigenwertkriterium (Eigenwert > 1) drei Faktoren extrahiert. Diese Faktoren klären insgesamt 62% der Gesamtvarianz. Tabelle 3 enthält die Faktorenladungsmatrix nach Rotation. Zur Übersichtlichkeit werden nur Ladungen > 0,3 gezeigt. Der erste Faktor beinhaltet die Items beider Phasen der Beteiligung an Alltagsentscheidungen. Der zweite Faktor beinhaltet primär die Items zur zweiten Phase, der dritte Faktor besteht aus den Items zur ersten Phase der Beteiligung an der Behandlung. Die a priori Differenzierung der Phasen lässt sich somit anhand der letzten beiden Faktoren vor allem für den Behandlungsbereich bestätigen. Auch die a priori Unterscheidung zwischen Alltag und Behandlung bilden sich in den Faktoren ab. Für den Alltagsbereich lassen sich die drei Phasen faktorenanalytisch nicht nachweisen.

| Items                                               | F1    | F2    | F3    |
|-----------------------------------------------------|-------|-------|-------|
| Wunsch nach gemeinsam Beratschlagen über Alltag     | ,81   |       |       |
| Wunsch nach Meinungsoffenheit bei Alltag            | ,79   |       |       |
| Wunsch nach Erklärung des Alltags                   | ,69   |       |       |
| Wunsch nach Fragenbeantwortung bei Alltag           | ,58   |       | ,53   |
| Wunsch nach Wissen des Arztes über Behandlung       |       | ,90   |       |
| Wunsch nach Wissen der Betreuer über Alltag         |       | ,72   |       |
| Wunsch nach gemeinsam Beratschlagen über Behandlung | ,43   | ,44   | ,39   |
| Wunsch nach Fragenbeantwortung bei Behandlung       |       |       | ,78   |
| Wunsch nach Erklärung der Behandlung                |       | ,50   | ,67   |
| Wunsch nach Meinungsoffenheit bei Behandlung        |       | ,30   | ,45   |
| Aufgeklärte Varianz (%)                             | 36,69 | 13,66 | 11,57 |

Tabelle 3: Ergebnis der Faktorenanalyse der Phasen-Items

Bei der Untersuchung der 21 Items zu Bereichen der Beteiligung konnten, nach Entfernen von vier Fragen mit geringen Trennschärfen, wieder drei Faktoren extrahiert werden. Sie erklären insgesamt 53% der Varianz. Tabelle 4 zeigt die Faktorenmatrix mit Ladungen > 0,3. Der erste Faktor bildet sich aus einer Item-Gruppe, die inhaltlich als „Interaktion mit der Außenwelt“ bezeichnet werden kann. Der zweite Faktor beinhaltet Fragen zum Alltag. Der dritte Faktor bezieht sich auf die Behandlung. Die vorab definierten Unterbereiche bildeten sich nicht ab. Mit dem ersten Faktor wurde ein neuer Bereich aufgedeckt, der a priori nicht bestand. Die im Vorhinein getroffene Unterscheidung zwischen Alltags- und Behandlungsbereichen zeigten sich im zweiten und dritten Faktor.

| Items                                                       | F1    | F2    | F3    |
|-------------------------------------------------------------|-------|-------|-------|
| Wunsch nach Mitentscheidung bei Verlassen der Station       | ,79   |       |       |
| Wunsch nach Mitentscheidung bei Besuchszeiten               | ,71   |       |       |
| Wunsch nach Mitentscheidung bei Freizeitgestaltung          | ,69   | ,37   |       |
| Wunsch nach Mitentscheidung bei Dauer des Aufenthalts       | ,66   |       |       |
| Wunsch nach Mitentscheidung bei Handynutzung                | ,63   |       |       |
| Wunsch nach Mitentscheidung bei Übernachtung zu Hause       | ,59   | ,36   |       |
| Wunsch nach Mitentscheidung bei Gemeinschaftsregeln         | ,31   |       |       |
| Wunsch nach Mitentscheidung bei Aufsteh- u. Zubettgehzeiten |       | ,78   |       |
| Wunsch nach Mitentscheidung bei Tagesablauf                 |       | ,72   |       |
| Wunsch nach Mitentscheidung bei Zimmergestaltung            | ,31   | ,72   |       |
| Wunsch nach Mitentscheidung bei Aktionstag                  |       | ,64   |       |
| Wunsch nach Mitentscheidung bei Essen und Trinken           |       | ,45   |       |
| Wunsch nach Mitentscheidung bei Gesprächstherapie           |       |       | ,73   |
| Wunsch nach Mitentscheidung bei Behandlung im Allgemeinen   |       |       | ,73   |
| Wunsch nach Mitentscheidung bei sonstigen Therapien         |       | ,32   | ,71   |
| Wunsch nach Mitentscheidung bei Medikamenten                |       |       | ,71   |
| Wunsch nach Mitentscheidung bei Klinikalltag im Allgemeinen | ,41   | ,40   | ,50   |
| Aufgeklärte Varianz (%)                                     | 19,85 | 17,84 | 15,13 |

Tabelle 4: Ergebnis der Faktorenanalyse der Bereiche-Items

In der Untersuchung der 10 Items zu Beteiligung „im weiteren Sinne“ (Respekt, Authentizität, Vertrauen, Selbstvertrauen) hatten beiden Items zu Authentizität eine geringe Inter-Item-Korrelation und konnten keinem Faktor eindeutig zugeordnet werden. Sie wurden daher für die weitere Analyse ausgeschlossen. Die Analyse der 8 übrigen Items ergab eine Zwei-Faktoren-Lösung. Sie erklärt 66% der Gesamtvarianz. Im ersten Faktor konnten die Items zu Wunsch nach Respekt empirisch bestätigt werden. Im zweiten Faktor wurde der Wunsch nach Vertrauen und Selbstvertrauen gebündelt (siehe Tabelle 5).

| Items                                               | F1    | F2    |
|-----------------------------------------------------|-------|-------|
| Wunsch nach „verstanden werden“                     | ,85   |       |
| Wunsch nach „Interesse“ der Behandler/Betreuer      | ,78   | ,31   |
| Wunsch nach „Respekt“ der Behandler/Betreuer        | ,74   | ,35   |
| Wunsch nach „ernst genommen werden“                 | ,73   |       |
| Wunsch nach „Vertrauen haben können“                |       | ,84   |
| Wunsch nach „Gefühle offen zeigen können“           | ,35   | ,81   |
| Wunsch nach „Ermutigung eigene Fragen zu stellen“   | ,35   | ,68   |
| Wunsch nach „Stärkung des eigenen Selbstvertrauens“ | ,34   | ,65   |
| Aufgeklärte Varianz (%)                             | 34,45 | 31,86 |

Tabelle 5: Ergebnis der Faktorenanalyse der Items zu Beteiligung „im weiteren Sinne“

Die a priori gebildeten Skalen wurden anhand der Faktorenanalyse optimiert. Bei den Phasen-Items wurden die Skalen der ersten beiden Phasen, aufgrund guter interner Konsistenz, beibehalten. Für die letzte Phase wurden nur die Items zu Behandlungsentscheidungen behalten. Bei den Bereiche-Items wurden die drei in der Faktorenanalyse extrahierten Bereiche als Skalen übernommen. Die vier Fragen mit geringer Trennschärfe wurde aus der weiteren Analyse ausgeschlossen. Bei den Items zu „Beteiligung im weiteren Sinne“ wurden die Fragen zu Vertrauen und Selbstvertrauen aufgrund der Faktorenanalyse als eine gemeinsame Skala betrachtet. Die Skala zu Authentizität wurde nicht weiter berücksichtigt. Die in der Folge beschriebenen Prüfungen und Ergebnisse beziehen sich auf die Skalen nach Anpassung anhand der Faktorenanalyse (vgl. Tabelle 1).
