# Supplementary material for: Wunsch und Erleben von Partizipation für Kinder und Jugendliche in der stationären Psychiatrie
Source: Atypon-hosted journal article supplement (doi:10.1024/1422-4917/a000797), 2021-05-01
Supplement: 1422-4917_a000797_esm2.pdf [file 1422-4917_a000797_esm2.pdf]

## FRAGEBOGEN

### Beteiligung von Patienten in der Kinder- und Jugendpsychiatrie

Liebe Teilnehmerinnen und Teilnehmer!

Der folgende Fragebogen ist in drei Abschnitte unterteilt:

Im ersten Abschnitt kannst du ankreuzen, **was dir im Allgemeinen wichtig ist.**

Im zweiten Abschnitt kannst du ankreuzen, **wie du deinen aktuellen Aufenthalt erlebt hast.**

Der dritte Abschnitt ist für **allgemeine Fragen**

Bei der Beantwortung der Fragen gibt es keine falschen oder richtigen Antworten, es geht um **Deine Meinung.**

An dem folgenden **Beispiel** kannst Du erkennen, wie Du bei der Beantwortung der Fragen vorgehen sollst.

| Es ist mir wichtig, dass ...                                                                                             | stimme nicht zu <span style="font-size: 2em;">→</span> stimme voll zu |                                     |                                     |                                     |                                     |
|--------------------------------------------------------------------------------------------------------------------------|-----------------------------------------------------------------------|-------------------------------------|-------------------------------------|-------------------------------------|-------------------------------------|
| ... die Sendung mit der Maus interessanter wird. (Beispielfrage)                                                         | <input type="checkbox"/>                                              | <input type="checkbox"/>            | <input type="checkbox"/>            | <input type="checkbox"/>            | <input type="checkbox"/>            |
| Wenn du dem Satz oben <u>vollkommen zustimmst</u> , dann kreuze bitte das ganz rechte Kästchen an.                       | <input type="checkbox"/>                                              | <input type="checkbox"/>            | <input type="checkbox"/>            | <input type="checkbox"/>            | <input checked="" type="checkbox"/> |
| Wenn du dem Satz oben <u>überhaupt nicht zustimmst</u> , dann kreuze bitte das ganz linke Kästchen an.                   | <input checked="" type="checkbox"/>                                   | <input type="checkbox"/>            | <input type="checkbox"/>            | <input type="checkbox"/>            | <input type="checkbox"/>            |
| Wenn du dem Satz oben <u>eher zustimmst</u> , dann kreuze bitte das Kästchen rechts von der Mitte an.                    | <input type="checkbox"/>                                              | <input type="checkbox"/>            | <input type="checkbox"/>            | <input checked="" type="checkbox"/> | <input type="checkbox"/>            |
| Wenn du dem Satz oben <u>eher nicht zustimmst</u> , dann kreuze bitte das Kästchen links von der Mitte an.               | <input type="checkbox"/>                                              | <input checked="" type="checkbox"/> | <input type="checkbox"/>            | <input type="checkbox"/>            | <input type="checkbox"/>            |
| Wenn du dem Satz oben <u>teilweise zustimmst aber teilweise auch nicht</u> , dann kreuze bitte das mittlere Kästchen an. | <input type="checkbox"/>                                              | <input type="checkbox"/>            | <input checked="" type="checkbox"/> | <input type="checkbox"/>            | <input type="checkbox"/>            |

Vielen Dank für deine Mitarbeit!

## 1. ABSCHNITT: Was dir im Allgemeinen wichtig ist.

Kreuze bitte das Kästchen an, das am besten dem entspricht, **wie sehr** du den folgenden Aussagen **zustimmst**.

| Es ist mir wichtig, dass ...                                                                                                      | stimme<br>nicht zu       | →                        | stimme<br>voll zu        |
|-----------------------------------------------------------------------------------------------------------------------------------|--------------------------|--------------------------|--------------------------|
| ... der Arzt oder Psychologe mir die <u>Behandlung</u> genau erklärt.                                                             | <input type="checkbox"/> | <input type="checkbox"/> | <input type="checkbox"/> |
| ... ich dem Arzt oder Psychologen meine Meinung über die <u>Behandlung</u> offen sagen kann.                                      | <input type="checkbox"/> | <input type="checkbox"/> | <input type="checkbox"/> |
| ... der Arzt oder Psychologe meine Fragen zur <u>Behandlung</u> vollständig und verständlich beantwortet.                         | <input type="checkbox"/> | <input type="checkbox"/> | <input type="checkbox"/> |
| ... der Arzt oder Psychologe über meine Situation gut Bescheid weiß.                                                              | <input type="checkbox"/> | <input type="checkbox"/> | <input type="checkbox"/> |
| ... ich gemeinsam mit dem Arzt oder Psychologen überlege, welche <u>Behandlung</u> für mich am besten ist                         | <input type="checkbox"/> | <input type="checkbox"/> | <input type="checkbox"/> |
| ... die Betreuer mir den <u>Alltag in der Klinik</u> genau erklären.                                                              | <input type="checkbox"/> | <input type="checkbox"/> | <input type="checkbox"/> |
| ... ich den Betreuern meine Meinung über den <u>Alltag in der Klinik</u> offen sagen kann.                                        | <input type="checkbox"/> | <input type="checkbox"/> | <input type="checkbox"/> |
| ... die Betreuer meine Fragen zum <u>Alltag in der Klinik</u> vollständig und verständlich beantworten.                           | <input type="checkbox"/> | <input type="checkbox"/> | <input type="checkbox"/> |
| ... die Betreuer über meine Situation gut Bescheid wissen.                                                                        | <input type="checkbox"/> | <input type="checkbox"/> | <input type="checkbox"/> |
| ... ich gemeinsam mit den Betreuern überlege, wie ich den <u>Alltag in der Klinik</u> am besten gestalten kann.                   | <input type="checkbox"/> | <input type="checkbox"/> | <input type="checkbox"/> |
| ... Ärzte, Psychologen und Betreuer versuchen zu verstehen, wie ich die Dinge sehe, bevor sie mir vorschlagen etwas zu verändern. | <input type="checkbox"/> | <input type="checkbox"/> | <input type="checkbox"/> |
| ... Ärzte, Psychologen und Betreuer an meiner Meinung interessiert sind.                                                          | <input type="checkbox"/> | <input type="checkbox"/> | <input type="checkbox"/> |
| ... Ärzte, Psychologen und Betreuer respektvoll mit mir umgehen.                                                                  | <input type="checkbox"/> | <input type="checkbox"/> | <input type="checkbox"/> |
| ... Ärzte, Psychologen und Betreuer mich ernst nehmen.                                                                            | <input type="checkbox"/> | <input type="checkbox"/> | <input type="checkbox"/> |
| ... Ärzte, Psychologen und Betreuer mich so akzeptieren wie ich bin.                                                              | <input type="checkbox"/> | <input type="checkbox"/> | <input type="checkbox"/> |
| ... Ärzte, Psychologen und Betreuer sich um mich als Mensch bemühen.                                                              | <input type="checkbox"/> | <input type="checkbox"/> | <input type="checkbox"/> |
| ... ich sehr großes Vertrauen in Ärzte, Psychologen und Betreuer haben kann.                                                      | <input type="checkbox"/> | <input type="checkbox"/> | <input type="checkbox"/> |
| ... ich den Ärzten, Psychologen und Betreuern meine Gefühle offen zeigen kann.                                                    | <input type="checkbox"/> | <input type="checkbox"/> | <input type="checkbox"/> |
| ... Ärzte, Psychologen und Betreuer mich dazu ermutigen Fragen zu stellen.                                                        | <input type="checkbox"/> | <input type="checkbox"/> | <input type="checkbox"/> |
| ... Ärzte, Psychologen und Betreuer mir Selbstvertrauen in meine eigene Fähigkeit zur Veränderung geben.                          | <input type="checkbox"/> | <input type="checkbox"/> | <input type="checkbox"/> |
| ... Ich mich mit anderen Patienten gut verstehe.                                                                                  | <input type="checkbox"/> | <input type="checkbox"/> | <input type="checkbox"/> |

Kreuze bitte das Kästchen an, das am besten dem entspricht, **wie wichtig** es dir ist, **bei Entscheidungen im genannten Bereich mitzuentcheiden**.

| <b>Mitzuentcheiden bei ...</b>                                                             | ist mir nicht wichtig <span style="display: inline-block; width: 100px; border-bottom: 1px solid black;"></span> → ist mir sehr wichtig |                          |                          |                          |                          |
|--------------------------------------------------------------------------------------------|-----------------------------------------------------------------------------------------------------------------------------------------|--------------------------|--------------------------|--------------------------|--------------------------|
| ... Behandlung (im Allgemeinen) ...                                                        | <input type="checkbox"/>                                                                                                                | <input type="checkbox"/> | <input type="checkbox"/> | <input type="checkbox"/> | <input type="checkbox"/> |
| ... Medikamenten ...                                                                       | <input type="checkbox"/>                                                                                                                | <input type="checkbox"/> | <input type="checkbox"/> | <input type="checkbox"/> | <input type="checkbox"/> |
| ... Gesprächstherapie ...                                                                  | <input type="checkbox"/>                                                                                                                | <input type="checkbox"/> | <input type="checkbox"/> | <input type="checkbox"/> | <input type="checkbox"/> |
| ... sonstigen Therapien (zum Beispiel Ergotherapie, Physiotherapie oder Musiktherapie) ... | <input type="checkbox"/>                                                                                                                | <input type="checkbox"/> | <input type="checkbox"/> | <input type="checkbox"/> | <input type="checkbox"/> |
| ... angebotenen Gruppen (zum Beispiel Spielegruppe, Kochgruppe oder Sportgruppe) ...       | <input type="checkbox"/>                                                                                                                | <input type="checkbox"/> | <input type="checkbox"/> | <input type="checkbox"/> | <input type="checkbox"/> |
| ... Erstellen des Therapieplans ...                                                        | <input type="checkbox"/>                                                                                                                | <input type="checkbox"/> | <input type="checkbox"/> | <input type="checkbox"/> | <input type="checkbox"/> |
| ... Dauer des Aufenthalts ...                                                              | <input type="checkbox"/>                                                                                                                | <input type="checkbox"/> | <input type="checkbox"/> | <input type="checkbox"/> | <input type="checkbox"/> |
| ... Besuchszeiten ...                                                                      | <input type="checkbox"/>                                                                                                                | <input type="checkbox"/> | <input type="checkbox"/> | <input type="checkbox"/> | <input type="checkbox"/> |
| ... Verlassen der Station am Tag ...                                                       | <input type="checkbox"/>                                                                                                                | <input type="checkbox"/> | <input type="checkbox"/> | <input type="checkbox"/> | <input type="checkbox"/> |
| ... Übernachtungen zu Hause ...                                                            | <input type="checkbox"/>                                                                                                                | <input type="checkbox"/> | <input type="checkbox"/> | <input type="checkbox"/> | <input type="checkbox"/> |
| ... Alltag in der Klinik (im Allgemeinen) ...                                              | <input type="checkbox"/>                                                                                                                | <input type="checkbox"/> | <input type="checkbox"/> | <input type="checkbox"/> | <input type="checkbox"/> |
| ... Gemeinschaftsregeln ...                                                                | <input type="checkbox"/>                                                                                                                | <input type="checkbox"/> | <input type="checkbox"/> | <input type="checkbox"/> | <input type="checkbox"/> |
| ... Küchendienst ...                                                                       | <input type="checkbox"/>                                                                                                                | <input type="checkbox"/> | <input type="checkbox"/> | <input type="checkbox"/> | <input type="checkbox"/> |
| ... Tagesablauf ...                                                                        | <input type="checkbox"/>                                                                                                                | <input type="checkbox"/> | <input type="checkbox"/> | <input type="checkbox"/> | <input type="checkbox"/> |
| ... Nutzung von Handy oder Telefon ...                                                     | <input type="checkbox"/>                                                                                                                | <input type="checkbox"/> | <input type="checkbox"/> | <input type="checkbox"/> | <input type="checkbox"/> |
| ... Freizeitbeschäftigungen ...                                                            | <input type="checkbox"/>                                                                                                                | <input type="checkbox"/> | <input type="checkbox"/> | <input type="checkbox"/> | <input type="checkbox"/> |
| ... Aktionstag ...                                                                         | <input type="checkbox"/>                                                                                                                | <input type="checkbox"/> | <input type="checkbox"/> | <input type="checkbox"/> | <input type="checkbox"/> |
| ... Film aussuchen ...                                                                     | <input type="checkbox"/>                                                                                                                | <input type="checkbox"/> | <input type="checkbox"/> | <input type="checkbox"/> | <input type="checkbox"/> |
| ... Aufsteh- und Zubettgehzeiten ...                                                       | <input type="checkbox"/>                                                                                                                | <input type="checkbox"/> | <input type="checkbox"/> | <input type="checkbox"/> | <input type="checkbox"/> |
| ... Essen und Trinken ...                                                                  | <input type="checkbox"/>                                                                                                                | <input type="checkbox"/> | <input type="checkbox"/> | <input type="checkbox"/> | <input type="checkbox"/> |
| ... Zimmer ...                                                                             | <input type="checkbox"/>                                                                                                                | <input type="checkbox"/> | <input type="checkbox"/> | <input type="checkbox"/> | <input type="checkbox"/> |

Kreuze bitte **EINE der Aussagen** an, die am besten beschreibt, welche Rolle dein Arzt (oder dein Psychologe) bei Entscheidungen zu deiner Behandlung **spielen soll**.

- Ich möchte selbst darüber entscheiden, welche Behandlung ich erhalte.
- Ich möchte selbst darüber entscheiden, welche Behandlung ich erhalte, nachdem ich die Meinung meines Arztes (oder Psychologen) berücksichtigt habe.
- Ich möchte, dass mein Arzt (oder Psychologe) und ich gemeinsam entscheiden, welche Behandlung ich erhalte.
- Ich möchte, dass mein Arzt (oder Psychologe) darüber entscheidet, welche Behandlung ich erhalte, nachdem er meine Meinung berücksichtigt hat.
- Ich möchte, dass mein Arzt (oder Psychologe) für mich entscheidet, welche Behandlung ich erhalte.

Kreuze bitte **EINE der Aussagen** an, die am besten beschreibt, welche Rolle deine Eltern bei Entscheidungen zu deiner Behandlung **spielen sollen**.

- Ich möchte selbst darüber entscheiden, welche Behandlung ich erhalte.
- Ich möchte selbst darüber entscheiden, welche Behandlung ich erhalte, nachdem ich die Meinung meiner Eltern berücksichtigt habe.
- Ich möchte, dass meine Eltern und ich gemeinsam entscheiden, welche Behandlung ich erhalte.
- Ich möchte, dass meine Eltern darüber entscheiden, welche Behandlung ich erhalte, nachdem sie meine Meinung berücksichtigt haben.
- Ich möchte, dass meine Eltern für mich entscheiden, welche Behandlung ich erhalte.

Kreuze bitte **EINE der Aussagen** an, die am ehesten zutrifft.

Wer soll über meine Behandlung hauptsächlich entscheiden?

- Ich selbst
- Arzt (oder Psychologe)
- Eltern
- \_\_\_\_\_ (Hier kannst du jemanden eintragen, wenn die bisherigen Antwortmöglichkeiten nicht zutreffen)

Kreuze bitte **EINE der Aussagen** an, die am besten beschreibt, welche Rolle deine Betreuer bei Entscheidungen zum Alltag in der Klinik **spielen sollen**.

- Ich möchte selbst darüber entscheiden, wie ich den Alltag in der Klinik am besten gestalten kann.
- Ich möchte selbst darüber entscheiden, wie ich den Alltag in der Klinik am besten gestalten kann, nachdem ich die Meinung meiner Betreuer berücksichtigt habe.
- Ich möchte, dass meine Betreuer und ich gemeinsam entscheiden, wie ich den Alltag in der Klinik am besten gestalten kann.
- Ich möchte, dass meine Betreuer darüber entscheiden, wie ich den Alltag in der Klinik am besten gestalten kann, nachdem sie meine Meinung berücksichtigt haben.
- Ich möchte, dass meine Betreuer für mich entscheiden, wie ich den Alltag in der Klinik am besten gestalten kann.

## 2. ABSCHNITT: Wie du deinen aktuellen Aufenthalt erlebt hast.

Kreuze bitte das Kästchen an, das am besten dem entspricht, **wie** du die aufgelisteten Punkte bei deinem **aktuellen Aufenthalt** hier in der Klinik **erlebt hast**.

|                                                                                                                                    | so<br>war das<br>nie     | —————→                   |                          |                          | so<br>war das<br>immer   |
|------------------------------------------------------------------------------------------------------------------------------------|--------------------------|--------------------------|--------------------------|--------------------------|--------------------------|
| Der Arzt oder Psychologe hat mir die <u>Behandlung</u> genau erklärt.                                                              | <input type="checkbox"/> |
| Ich konnte dem Arzt oder Psychologen meine Meinung über die <u>Behandlung</u> offen sagen.                                         | <input type="checkbox"/> |
| Der Arzt oder Psychologe hat meine Fragen zur <u>Behandlung</u> vollständig und verständlich beantwortet.                          | <input type="checkbox"/> |
| Der Arzt oder Psychologe wusste über meine Situation gut Bescheid.                                                                 | <input type="checkbox"/> |
| Ich konnte gemeinsam mit dem Arzt oder Psychologen überlegen, welche <u>Behandlung</u> für mich am besten ist.                     | <input type="checkbox"/> |
| Die Betreuer haben mir den <u>Alltag in der Klinik</u> genau erklärt.                                                              | <input type="checkbox"/> |
| Ich konnte den Betreuern meine Meinung über den <u>Alltag in der Klinik</u> offen sagen.                                           | <input type="checkbox"/> |
| Die Betreuer haben meine Fragen zum <u>Alltag in der Klinik</u> vollständig und verständlich beantwortet.                          | <input type="checkbox"/> |
| Die Betreuer wussten über meine Situation gut Bescheid.                                                                            | <input type="checkbox"/> |
| Ich konnte gemeinsam mit den Betreuern überlegen, wie ich den <u>Alltag in der Klinik</u> am besten gestalten kann.                | <input type="checkbox"/> |
| Ärzte, Psychologen und Betreuer haben versucht zu verstehen, wie ich die Dinge sehe, bevor sie mir vorschlagen etwas zu verändern. | <input type="checkbox"/> |
| Ärzte, Psychologen und Betreuer waren an meiner Meinung interessiert.                                                              | <input type="checkbox"/> |
| Ärzte, Psychologen und Betreuer sind respektvoll mit mir umgegangen.                                                               | <input type="checkbox"/> |
| Ärzte, Psychologen und Betreuer haben mich ernst genommen.                                                                         | <input type="checkbox"/> |
| Ärzte, Psychologen und Betreuer haben mich so akzeptiert wie ich bin.                                                              | <input type="checkbox"/> |
| Ärzte, Psychologen und Betreuer haben sich um mich als Mensch bemüht.                                                              | <input type="checkbox"/> |
| Ich hatte sehr großes Vertrauen in die Ärzte, Psychologen und Betreuer.                                                            | <input type="checkbox"/> |
| Ich konnte den Ärzten, Psychologen und Betreuern meine Gefühle offen zeigen.                                                       | <input type="checkbox"/> |
| Ärzte, Psychologen und Betreuer haben mich dazu ermutigt Fragen zu stellen.                                                        | <input type="checkbox"/> |
| Ärzte, Psychologen und Betreuer haben mir Selbstvertrauen gegeben in meine eigene Fähigkeit zur Veränderung.                       | <input type="checkbox"/> |
| Ich habe mich mit anderen Patienten gut verstanden.                                                                                | <input type="checkbox"/> |

Kreuze bitte das Kästchen an, das am besten dem entspricht, **wie oft du** im genannten Bereich bei Entscheidungen hier in der Klinik **mitentscheiden konntest**.

(„nicht relevant“ bedeutet, dass in diesem Bereich keine Entscheidungen getroffen werden mussten)

| <b>Mitentscheiden bei ...</b>                                                              | konnte ich<br><b>nie</b> |                          |                          | → | konnte ich<br><b>immer</b> |                          | nicht<br>rele-<br>vant   |
|--------------------------------------------------------------------------------------------|--------------------------|--------------------------|--------------------------|---|----------------------------|--------------------------|--------------------------|
| ... Behandlung (im Allgemeinen) ...                                                        | <input type="checkbox"/> | <input type="checkbox"/> | <input type="checkbox"/> |   | <input type="checkbox"/>   | <input type="checkbox"/> | <input type="checkbox"/> |
| ... Medikamenten ...                                                                       | <input type="checkbox"/> | <input type="checkbox"/> | <input type="checkbox"/> |   | <input type="checkbox"/>   | <input type="checkbox"/> | <input type="checkbox"/> |
| ... Gesprächstherapie ...                                                                  | <input type="checkbox"/> | <input type="checkbox"/> | <input type="checkbox"/> |   | <input type="checkbox"/>   | <input type="checkbox"/> | <input type="checkbox"/> |
| ... sonstigen Therapien (zum Beispiel Ergotherapie, Physiotherapie oder Musiktherapie) ... | <input type="checkbox"/> | <input type="checkbox"/> | <input type="checkbox"/> |   | <input type="checkbox"/>   | <input type="checkbox"/> | <input type="checkbox"/> |
| ... angebotenen Gruppen (zum Beispiel Spielegruppe, Kochgruppe oder Sportgruppe) ...       | <input type="checkbox"/> | <input type="checkbox"/> | <input type="checkbox"/> |   | <input type="checkbox"/>   | <input type="checkbox"/> | <input type="checkbox"/> |
| ... Erstellen des Therapieplans ...                                                        | <input type="checkbox"/> | <input type="checkbox"/> | <input type="checkbox"/> |   | <input type="checkbox"/>   | <input type="checkbox"/> | <input type="checkbox"/> |
| ... Dauer des Aufenthalts ...                                                              | <input type="checkbox"/> | <input type="checkbox"/> | <input type="checkbox"/> |   | <input type="checkbox"/>   | <input type="checkbox"/> | <input type="checkbox"/> |
| ... Besuchszeiten ...                                                                      | <input type="checkbox"/> | <input type="checkbox"/> | <input type="checkbox"/> |   | <input type="checkbox"/>   | <input type="checkbox"/> | <input type="checkbox"/> |
| ... Verlassen der Station am Tag ...                                                       | <input type="checkbox"/> | <input type="checkbox"/> | <input type="checkbox"/> |   | <input type="checkbox"/>   | <input type="checkbox"/> | <input type="checkbox"/> |
| ... Übernachtungen zu Hause ...                                                            | <input type="checkbox"/> | <input type="checkbox"/> | <input type="checkbox"/> |   | <input type="checkbox"/>   | <input type="checkbox"/> | <input type="checkbox"/> |
| ... Alltag in der Klinik (im Allgemeinen) ...                                              | <input type="checkbox"/> | <input type="checkbox"/> | <input type="checkbox"/> |   | <input type="checkbox"/>   | <input type="checkbox"/> | <input type="checkbox"/> |
| ... Gemeinschaftsregeln ...                                                                | <input type="checkbox"/> | <input type="checkbox"/> | <input type="checkbox"/> |   | <input type="checkbox"/>   | <input type="checkbox"/> | <input type="checkbox"/> |
| ... Küchendienst ...                                                                       | <input type="checkbox"/> | <input type="checkbox"/> | <input type="checkbox"/> |   | <input type="checkbox"/>   | <input type="checkbox"/> | <input type="checkbox"/> |
| ... Nutzung von Handy oder Telefon ...                                                     | <input type="checkbox"/> | <input type="checkbox"/> | <input type="checkbox"/> |   | <input type="checkbox"/>   | <input type="checkbox"/> | <input type="checkbox"/> |
| ... Tagesablauf ...                                                                        | <input type="checkbox"/> | <input type="checkbox"/> | <input type="checkbox"/> |   | <input type="checkbox"/>   | <input type="checkbox"/> | <input type="checkbox"/> |
| ... Freizeitbeschäftigungen ...                                                            | <input type="checkbox"/> | <input type="checkbox"/> | <input type="checkbox"/> |   | <input type="checkbox"/>   | <input type="checkbox"/> | <input type="checkbox"/> |
| ... Aktionstag ...                                                                         | <input type="checkbox"/> | <input type="checkbox"/> | <input type="checkbox"/> |   | <input type="checkbox"/>   | <input type="checkbox"/> | <input type="checkbox"/> |
| ... Film aussuchen ...                                                                     | <input type="checkbox"/> | <input type="checkbox"/> | <input type="checkbox"/> |   | <input type="checkbox"/>   | <input type="checkbox"/> | <input type="checkbox"/> |
| ... Aufsteh- und Zubettgehzeiten ...                                                       | <input type="checkbox"/> | <input type="checkbox"/> | <input type="checkbox"/> |   | <input type="checkbox"/>   | <input type="checkbox"/> | <input type="checkbox"/> |
| ... Essen und Trinken ...                                                                  | <input type="checkbox"/> | <input type="checkbox"/> | <input type="checkbox"/> |   | <input type="checkbox"/>   | <input type="checkbox"/> | <input type="checkbox"/> |
| ... Zimmer ...                                                                             | <input type="checkbox"/> | <input type="checkbox"/> | <input type="checkbox"/> |   | <input type="checkbox"/>   | <input type="checkbox"/> | <input type="checkbox"/> |

Kreuze bitte **EINE der Aussagen** an, die am besten beschreibt, wie du die Rolle deines Arztes (oder deines Psychologen) bei Entscheidungen zur Behandlung hier in der Klinik **erlebt hast**.

- Ich habe selbst darüber entschieden, welche Behandlung ich erhalte.
- Ich habe selbst darüber entschieden, welche Behandlung ich erhalte, nachdem ich die Meinung meines Arztes (oder Psychologen) berücksichtigt habe.
- Ich habe gemeinsam mit meinem Arzt (oder Psychologen) entschieden, welche Behandlung ich erhalte.
- Mein Arzt (oder Psychologe) hat darüber entschieden, welche Behandlung ich erhalte, nachdem er meine Meinung berücksichtigt hat.
- Mein Arzt (oder Psychologe) hat für mich entschieden, welche Behandlung ich erhalte.

Kreuze bitte **EINE der Aussagen** an, die am besten beschreibt, wie du die Rolle deiner Eltern bei Entscheidungen zur Behandlung hier in der Klinik **erlebt hast**.

- Ich habe selbst darüber entschieden, welche Behandlung ich erhalte.
- Ich habe selbst darüber entschieden, welche Behandlung ich erhalte, nachdem ich die Meinung meiner Eltern berücksichtigt habe.
- Ich habe gemeinsam mit meinen Eltern entschieden, welche Behandlung ich erhalte.
- Meine Eltern haben darüber entschieden, welche Behandlung ich erhalte, nachdem sie meine Meinung berücksichtigt haben
- Meine Eltern haben für mich entschieden, welche Behandlung ich erhalte.

Kreuze bitte **EINE der Aussagen** an, die am ehesten zutrifft.

Wer hat am meisten über deine Behandlung entschieden?

- Ich selbst
- Arzt (oder Psychologe)
- Eltern
- \_\_\_\_\_ (Hier kannst du jemanden eintragen, wenn die bisherigen Antwortmöglichkeiten nicht zutreffen)

Kreuze bitte **EINE der Aussagen** an, die am besten beschreibt, wie du die Rolle deiner Betreuer bei Entscheidungen zum Alltag hier in der Klinik **erlebt hast**.

- Ich habe selbst darüber entschieden, wie ich den Alltag in der Klinik am besten gestalten kann.
- Ich habe selbst darüber entschieden, wie ich den Alltag in der Klinik am besten gestalten kann, nachdem ich die Meinung meiner Betreuer berücksichtigt habe.
- Ich habe gemeinsam mit meinen Betreuern entscheiden, wie ich den Alltag in der Klinik am besten gestalten kann.
- Meine Betreuer haben darüber entschieden, wie ich den Alltag in der Klinik am besten gestalten kann, nachdem sie meine Meinung berücksichtigt haben
- Meine Betreuer haben für mich entschieden, wie ich den Alltag in der Klinik am besten gestalten kann.

Schreibe bitte Bereiche hier in der Klinik auf, die **bisher noch nicht genannt** wurden, in denen du **gerne mehr mitentscheiden würdest**.

In folgenden Bereichen würde ich gerne mehr mitentscheiden:

---



---



---



---



---



---

Schreibe bitte den Bereich hier in der Klinik auf, bei dem es dir **am wichtigsten** ist **mitzuentcheiden**.  
(Das kann auch ein Bereich sein, der schon im Fragebogen oder von Dir genannt wurde)

In diesem Bereich ist es mir am wichtigsten mitzuentcheiden:

---

### Gesamtbewertung

| Bist du <u>zufrieden</u> ...                                                        | nicht zufrieden          | —————>                   |                          |                          | sehr zufrieden           |
|-------------------------------------------------------------------------------------|--------------------------|--------------------------|--------------------------|--------------------------|--------------------------|
| ... mit der <u>Behandlung</u> hier in der Klinik?                                   | <input type="checkbox"/> |
| ... mit dem <u>Alltag</u> hier in der Klinik?                                       | <input type="checkbox"/> |
| ... mit der <u>Information</u> hier in der Klinik?                                  | <input type="checkbox"/> |
| ... mit der Form, in der hier in der Klinik <u>Entscheidungen</u> getroffen werden? | <input type="checkbox"/> |
| ... mit deinem Klinikaufenthalt ganz allgemein?                                     | <input type="checkbox"/> |

Gibt es noch etwas, das du zu deinem Klinikaufenthalt sagen möchtest?

---



---



---



### 3. ABSCHNITT: Allgemeine Fragen

#### Zu deiner Person:

Wie alt bist du? \_\_\_\_\_

Welches Geschlecht hast du? Weiblich  Männlich  Anderes , (und zwar: \_\_\_\_\_)

Wo wohnst du, wenn du nicht in der Klinik bist? Eltern  Pflegeeltern  Wohngruppe  Alleine   
Sonstiges: \_\_\_\_\_

Auf was für eine Schule gehst du? Grundschule  Hauptschule  Realschule  Gymnasium   
Gesamtschule  Förderschule  Sonstiges: \_\_\_\_\_

#### Zu deiner Gesundheit:

Hast du eine psychische Erkrankung? Ja  Nein

Wenn ja, welche psychische Erkrankung hast du? \_\_\_\_\_

Wenn ja, wie lange hast du diese psychische Erkrankung schon? \_\_\_\_\_

Wenn ja, würdest du sagen du hast eine „schwere psychische Erkrankung“? Ja  Mittel  Nein

Musst du regelmäßig Medikamente nehmen? Ja  Nein

Wenn ja, welche Medikamente nimmst du regelmäßig? \_\_\_\_\_

Wenn ja, wie lange nimmst du diese Medikamente schon? \_\_\_\_\_

#### Zu deiner Behandlung:

Wie lange bist du schon hier in der Klinik in Behandlung? \_\_\_\_\_

Wann wirst du voraussichtlich entlassen? \_\_\_\_\_

Bist du freiwillig hier in der Klinik? Ja  Nein

Kannst du die Station (für eine kurze Zeit) verlassen, wenn du möchtest? Ja  Nein

Gibt es noch etwas, das du los werden möchtest?

---

Vielen Dank für deine Mitarbeit!
